# Supplementary material for: MKK3 sustains cell proliferation and survival through p38DELTA MAPK activation in colorectal cancer
Source: PubMed Central journal article supplement (PMC6834673; doi:10.1038/s41419-019-2083-2), 2019-11-06

# Figure 2b

Colo205

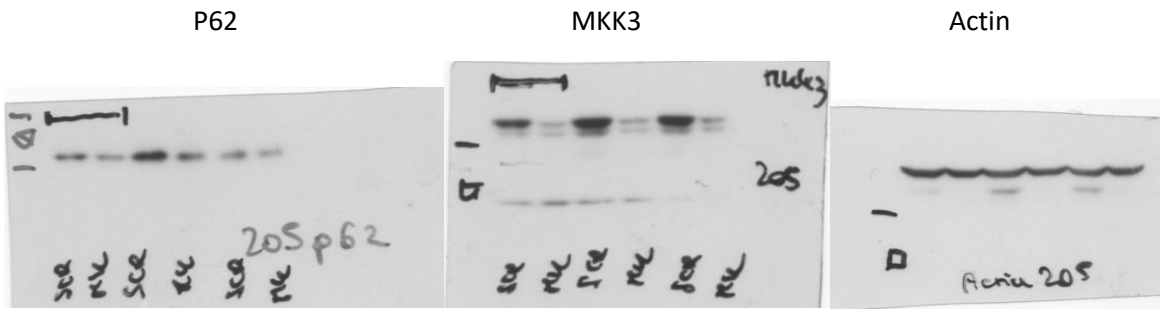

HCT-116

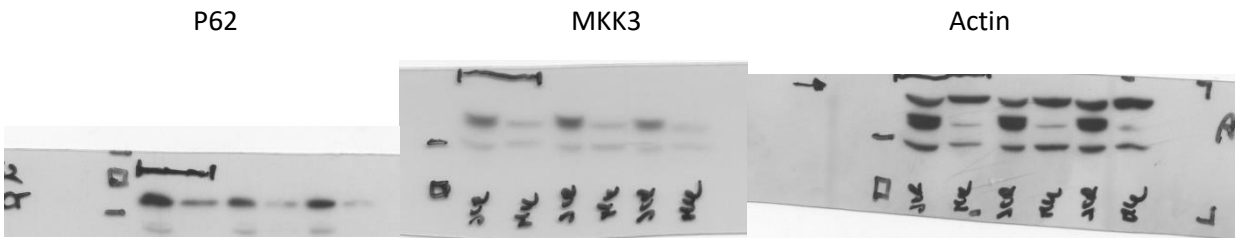

HT-29

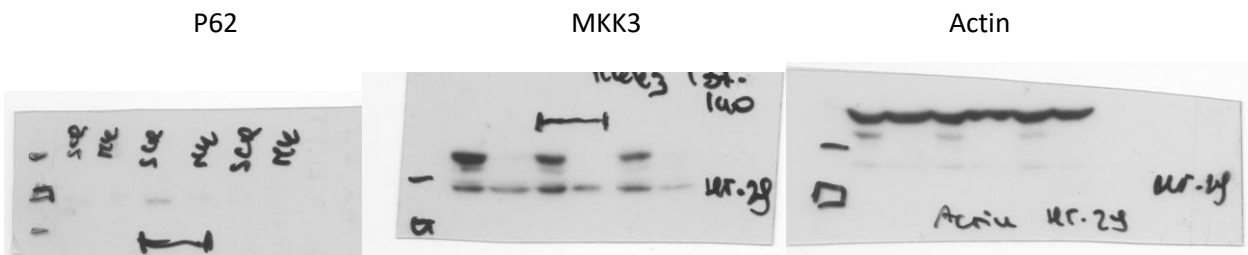

SW480

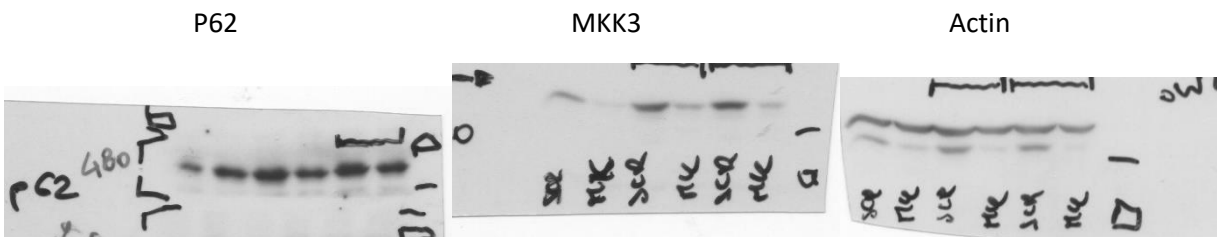

SW620

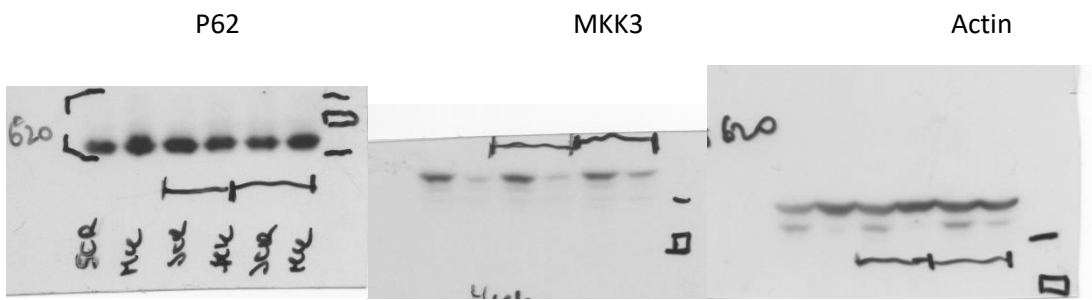

CCD841 and CCD18

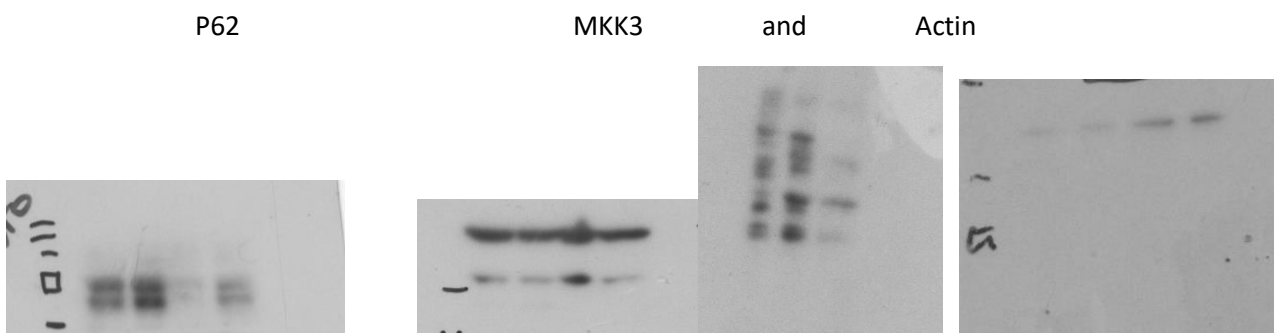

## Figure 2C

LC3

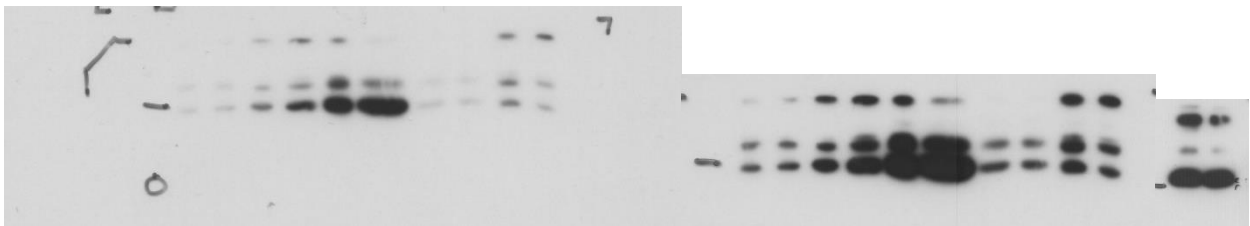

Actin

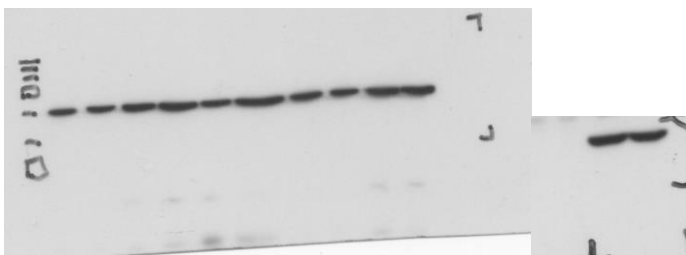

Figure 3b

Actin MKK3

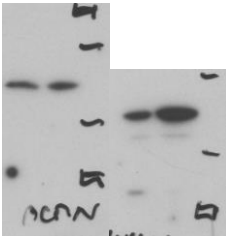

Figure3C

Colo205

pMKK3/6 MKK3 MKK6 Actin

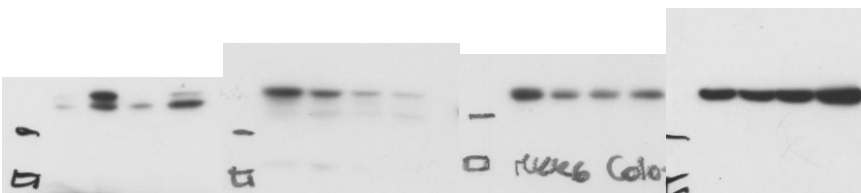

HCT116

pMKK3/6 MKK3 MKK6 Actin

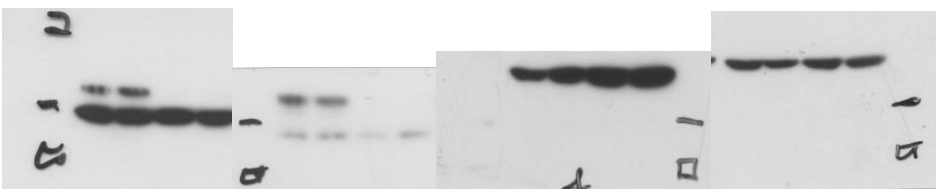

HT-29

pMKK3/6 MKK3 MKK6 Actin

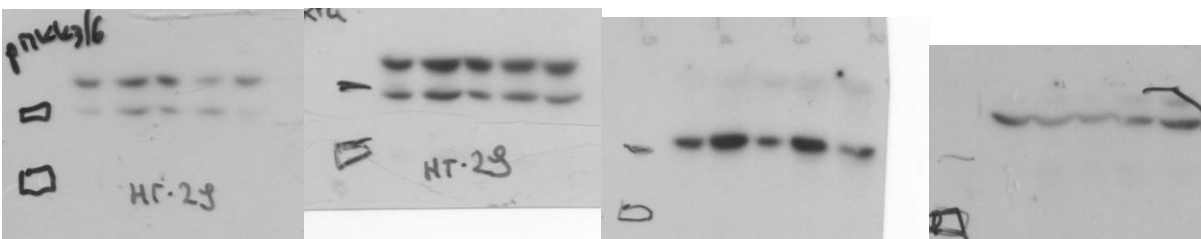

SW480

pMKK3/6 MKK3 MKK6 Actin

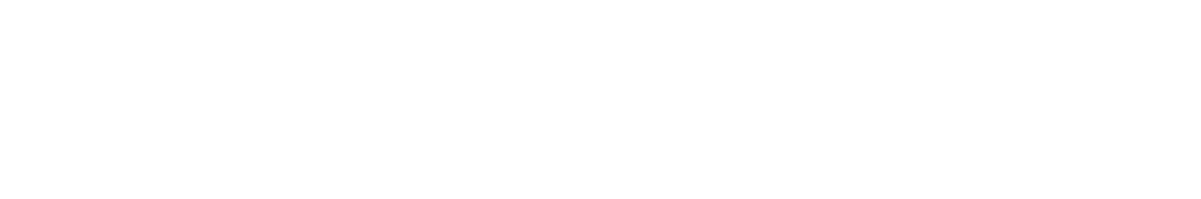

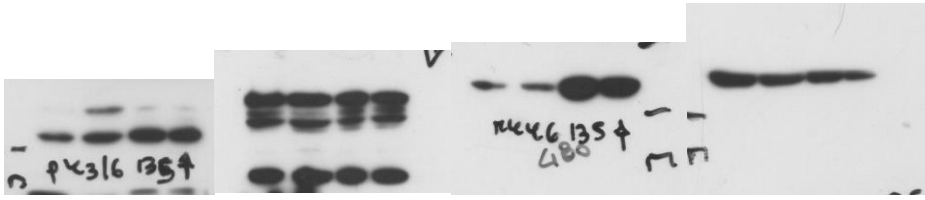

SW620

pMKK3/6

MKK3

MKK6

Actin

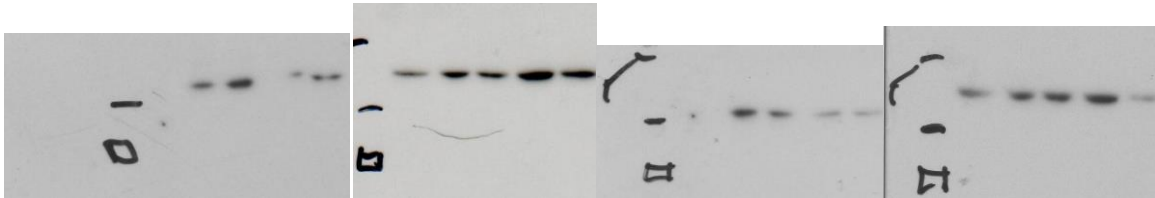

CCD18CO and CCD841

pMKK3/6

MKK3

MKK6

Actin

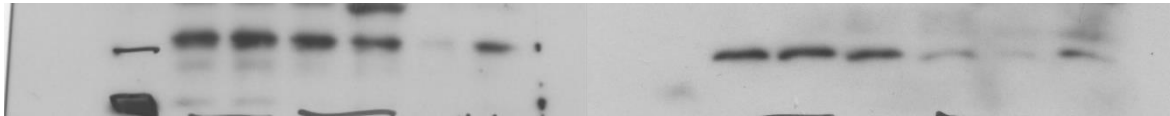

# Figure 4A

phosphoP38

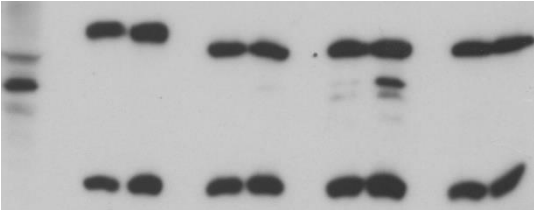

p38 alfa and delta

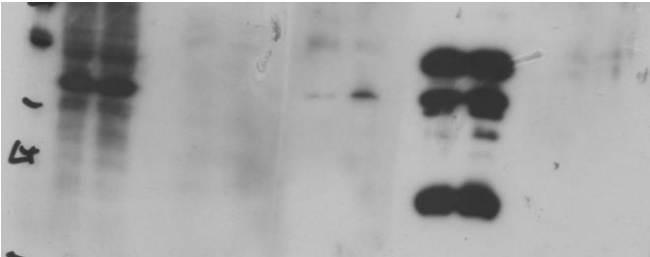

P38 total

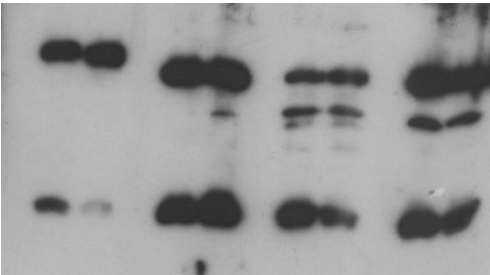

# Figure 4B

phosphoP38

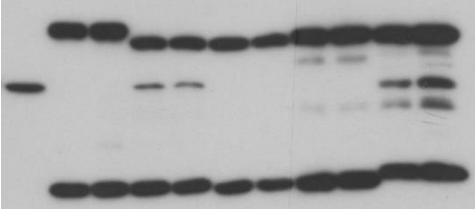

P38 total

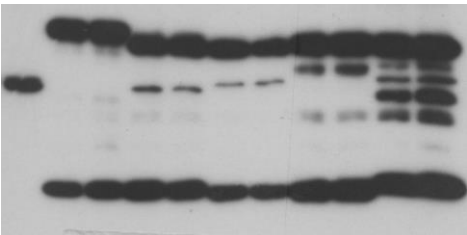

# Figure 5A

HT29

pMKK3/6

MKK3

ERCC1

Actin

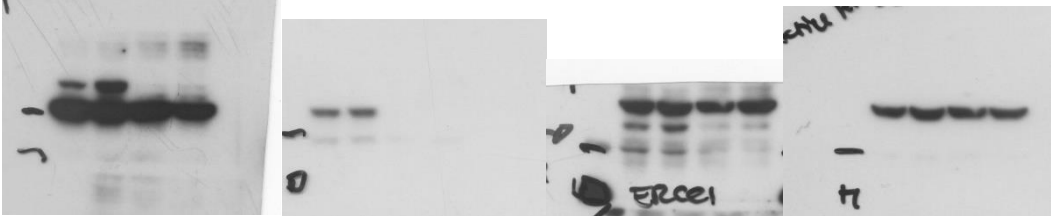

SW620

pMKK3/6

MKK3

ERCC1

Actin

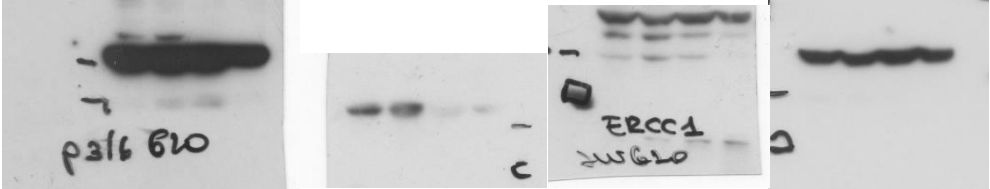

# Figure 5B

HT29

P38delta

p62

ERCC1

Actin

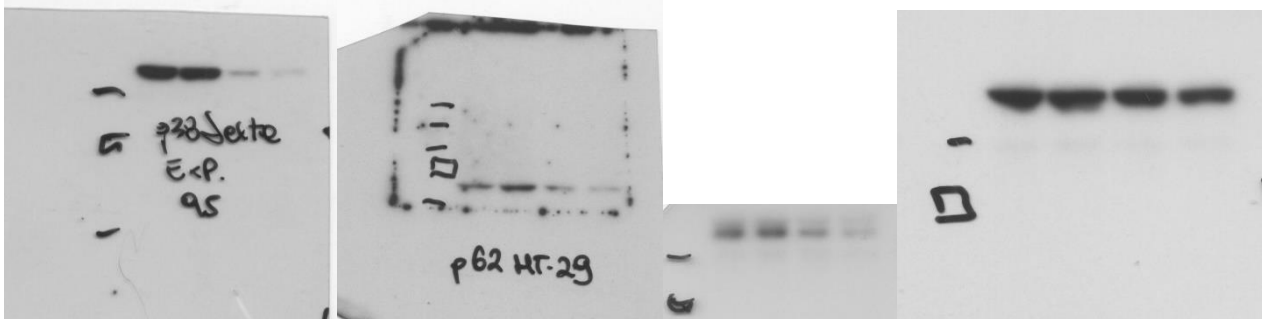

SW620

P38delta

p62

ERCC1

Actin

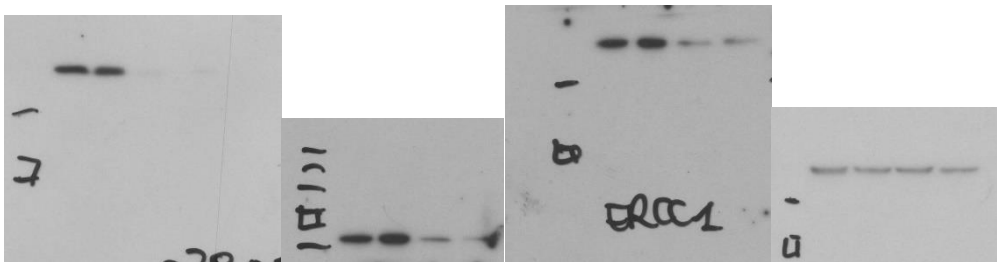

# Figure 6C

PARP

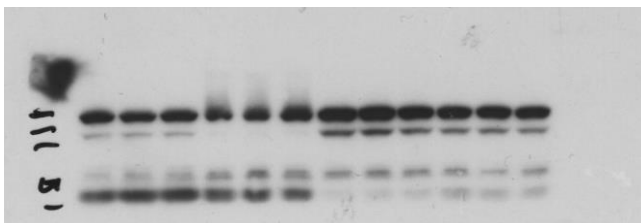

P38delta

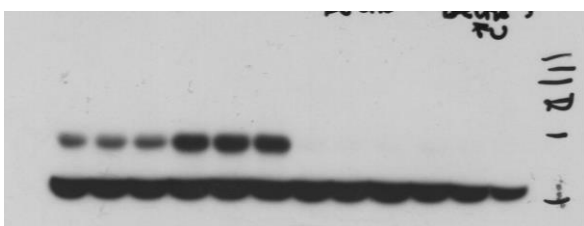

P62 and ERCC1

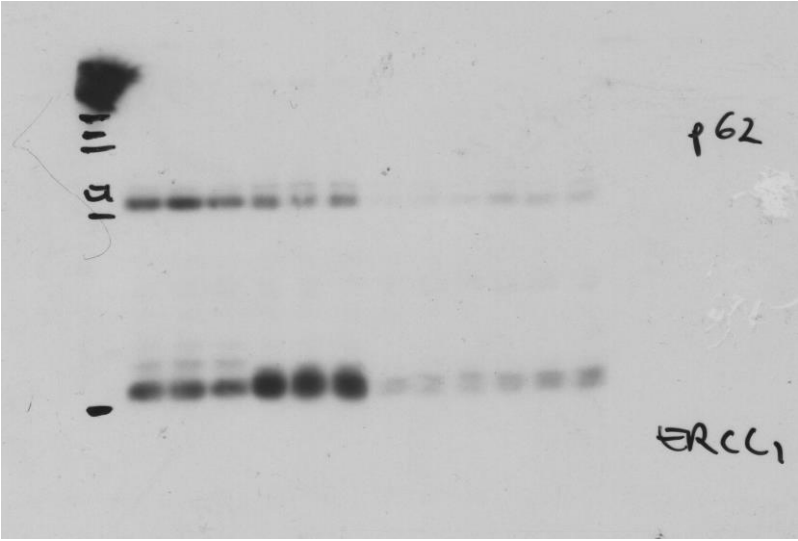

Actin

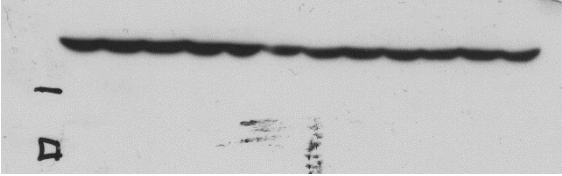

Supplement: 41419_2019_2083_MOESM13_ESM.pdf [file 41419_2019_2083_MOESM13_ESM.pdf]
